# Supplementary material for: Metatranscriptomic Sequencing of Medically Important Mosquitoes Reveals Extensive Diversity of RNA Viruses and Other Microbial Communities in Western Australia
Source: MDPI journal article supplement (doi:10.3390/pathogens13020107), 2024-01-25
Supplement: s1 [file s1]

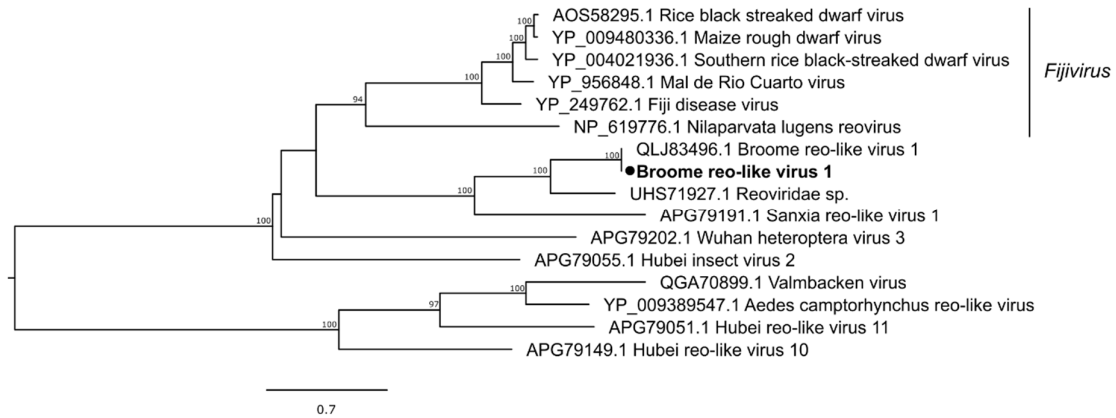

**Figure S1.** Midpoint rooted maximum likelihood phylogenetic tree of reoviruses showing the position of new variant identified (represented by a solid black circle). Bootstrap support values are displayed when greater than 70.

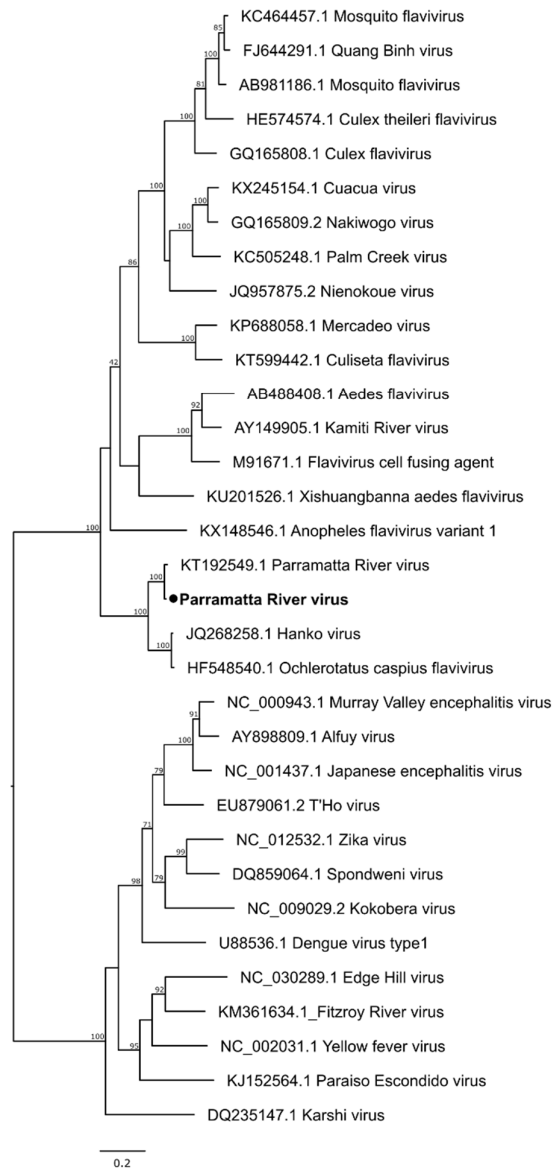

**Figure S2.** Midpoint rooted maximum likelihood phylogenetic tree of orthoflaviviruses showing the position of new variant identified (represented by a solid black circle). Bootstrap support values are displayed when greater than 70.

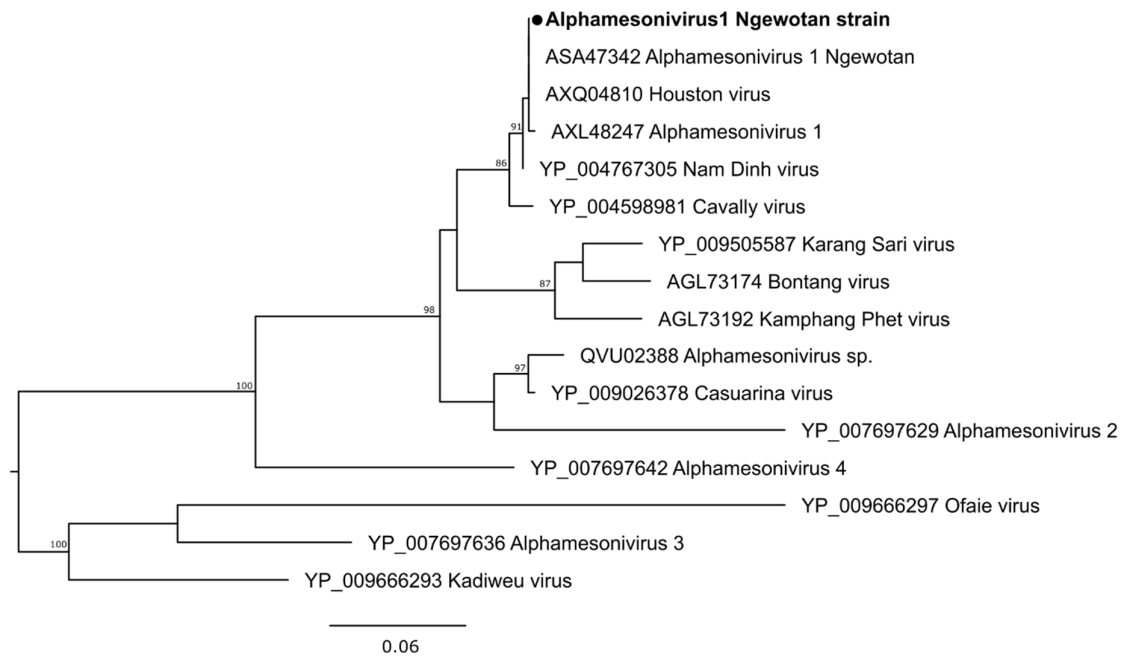

**Figure S3.** Midpoint rooted maximum likelihood phylogenetic tree of mesoniviruses showing the position of new variant identified (represented by a solid black circle). Bootstrap support values are displayed when greater than 70.

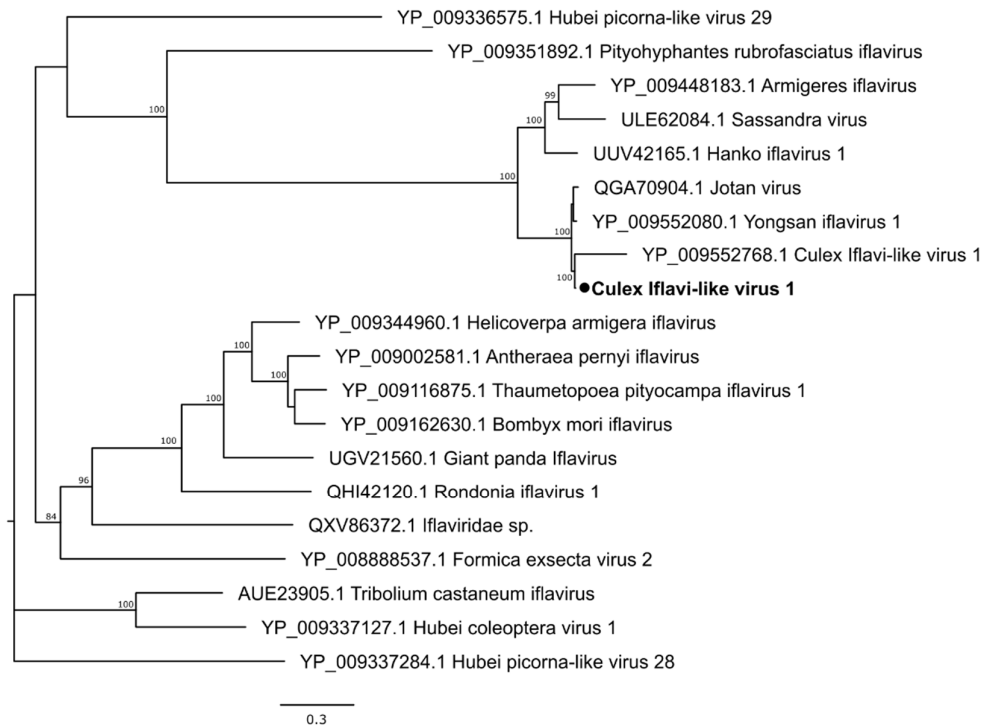

**Figure S4.** Midpoint rooted maximum likelihood phylogenetic tree of iflaviviruses showing the position of new variant identified (represented by a solid black circle). Bootstrap support values are displayed when greater than 70.

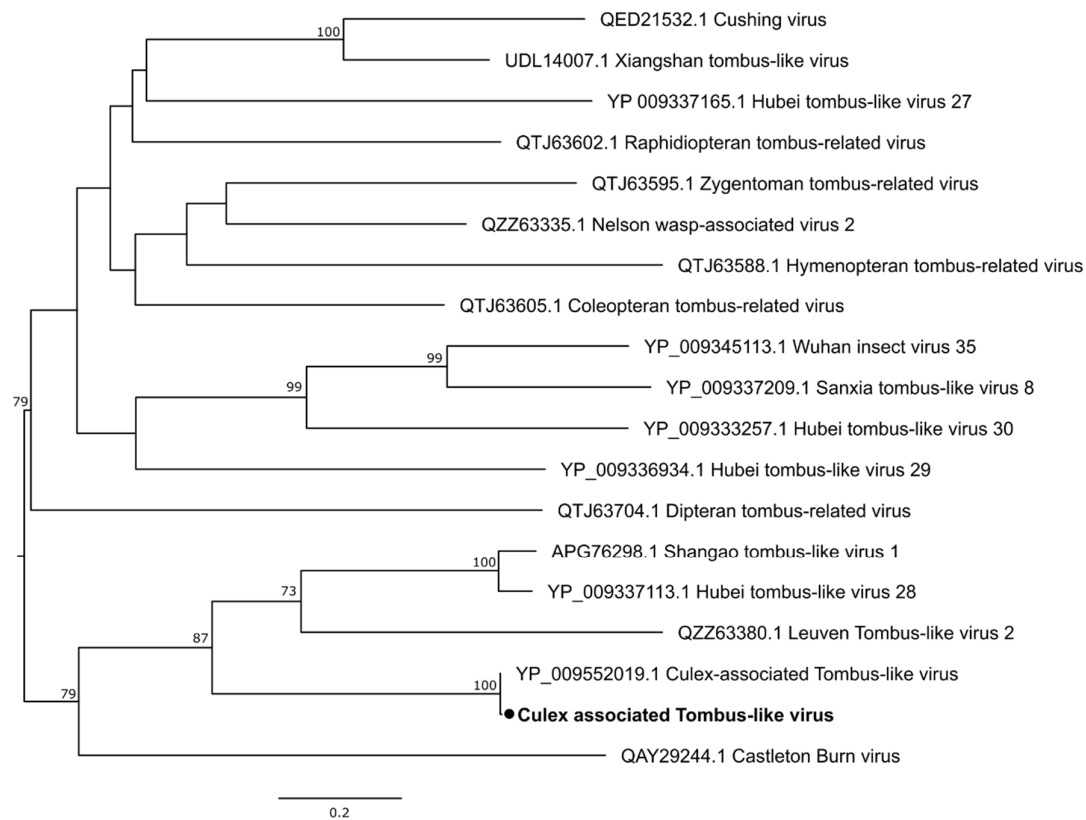

**Figure S5.** Midpoint rooted maximum likelihood phylogenetic tree of tombusviruses showing the position of new variant identified (represented by a solid black circle). Bootstrap support values are displayed when greater than 70.

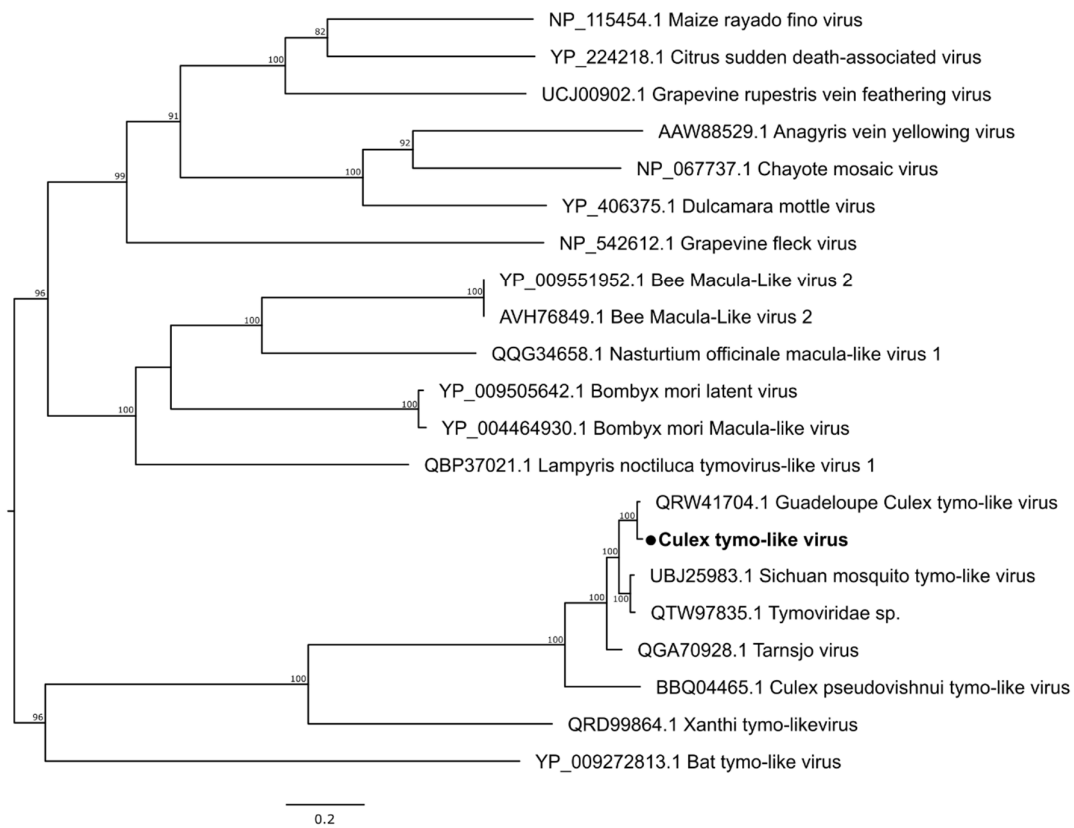

**Figure S6.** Midpoint rooted maximum likelihood phylogenetic tree of tymoviruses showing the position of new variant identified (represented by a solid black circle). Bootstrap support values are displayed when greater than 70.

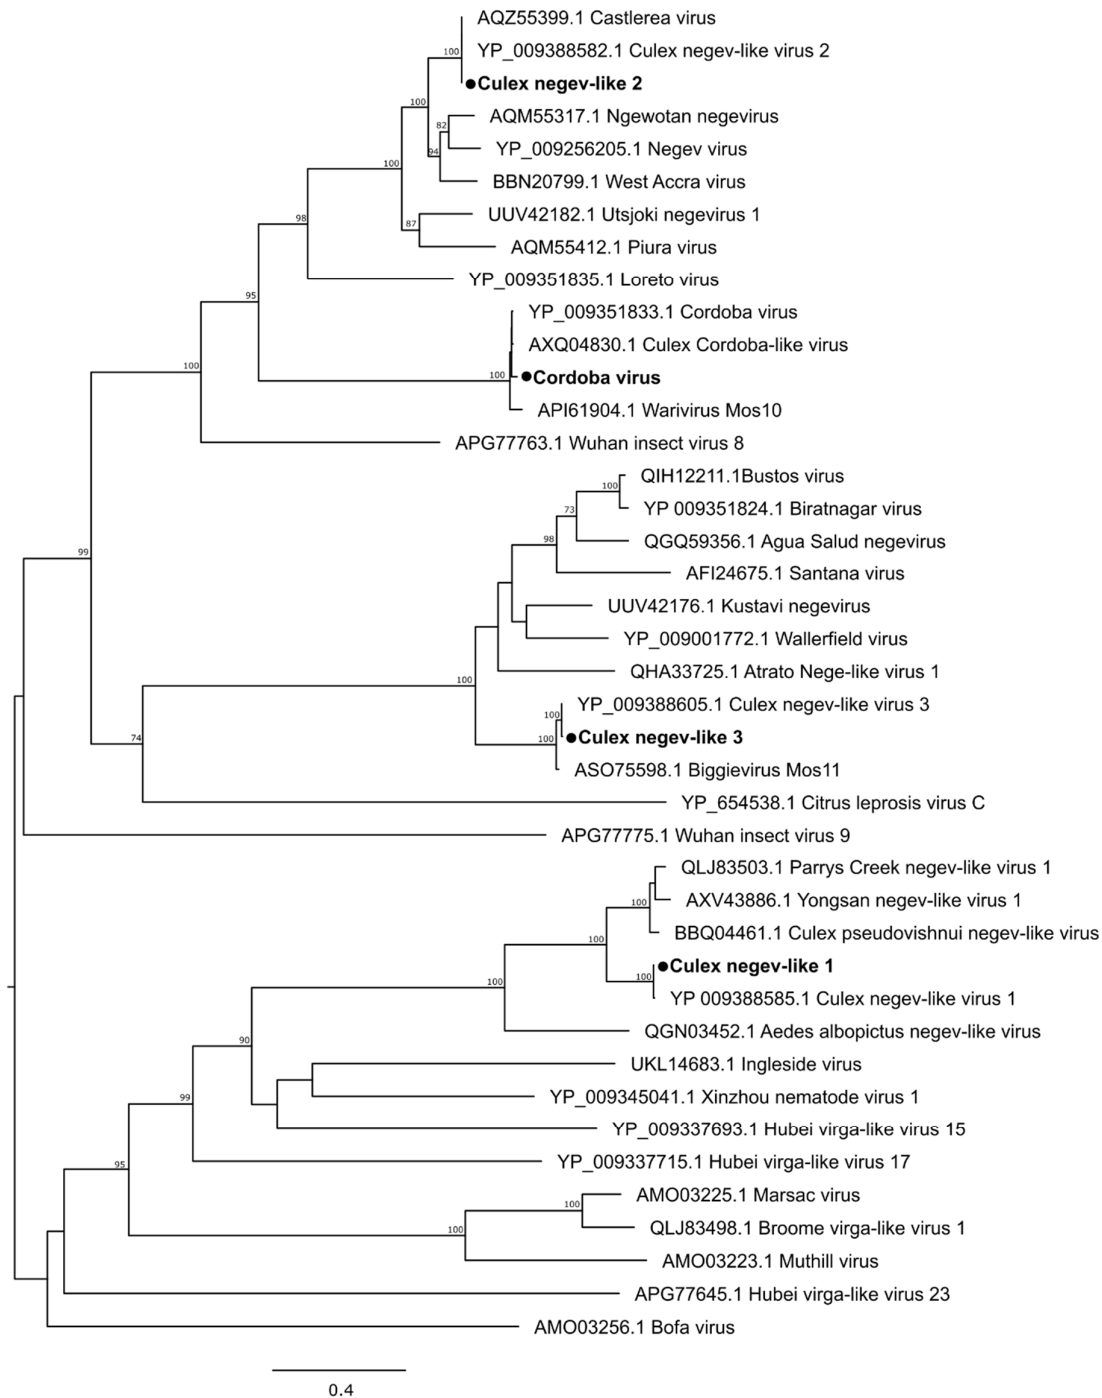

**Figure S7.** Midpoint rooted maximum likelihood phylogenetic tree of negev-like viruses showing the position of new variant identified (represented by a solid black circle). Bootstrap support values are displayed when greater than 70.

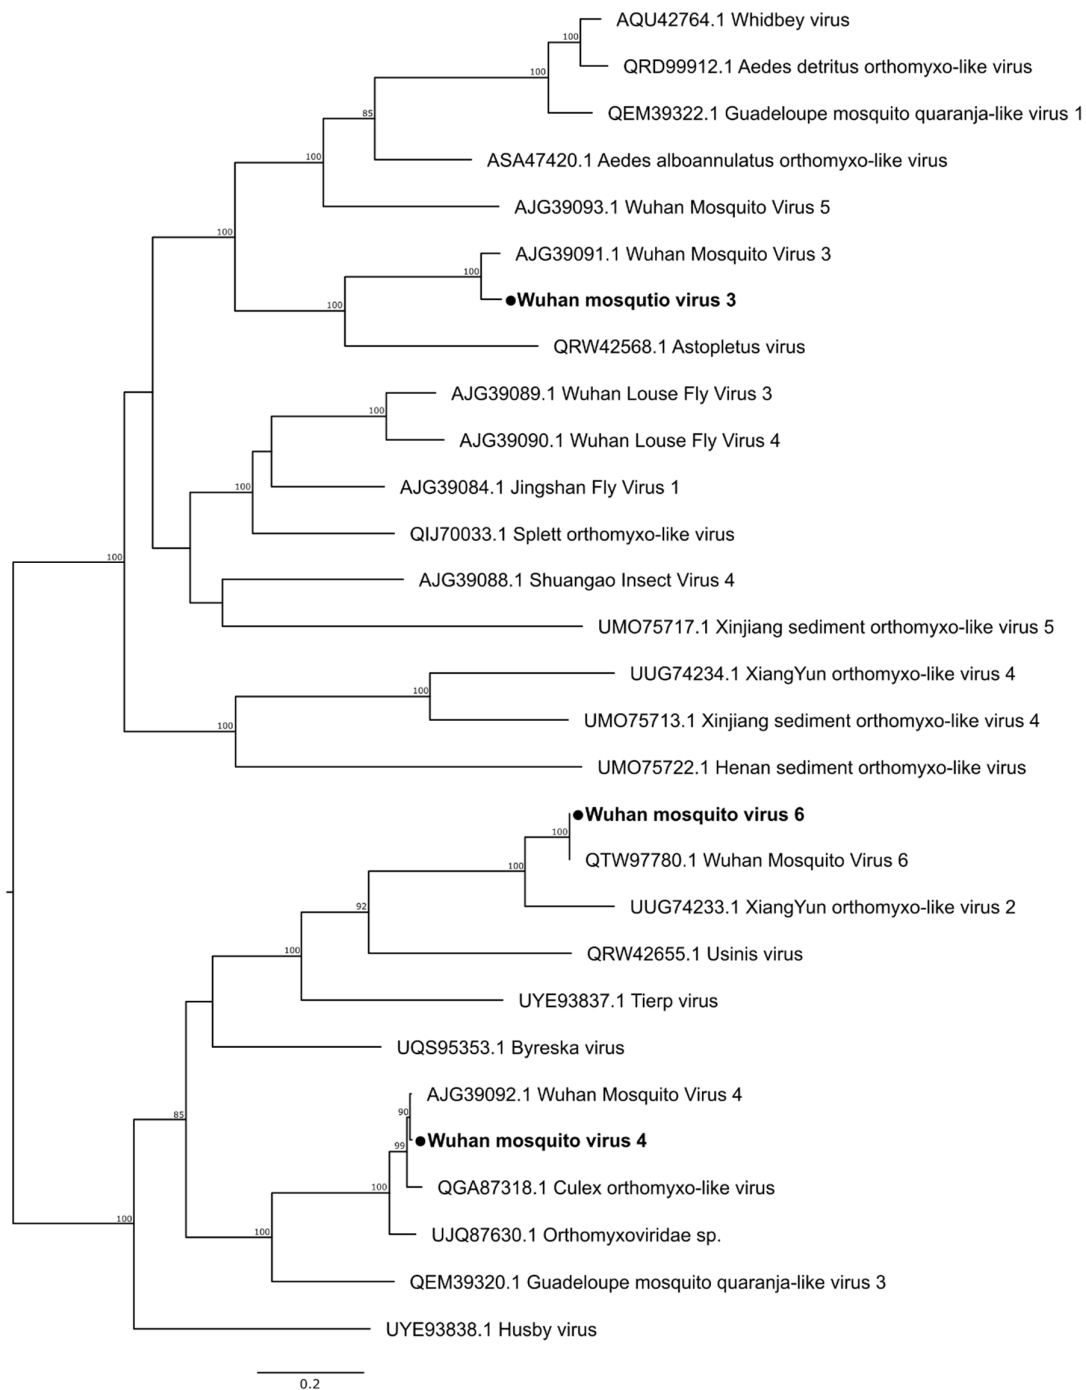

**Figure S8.** Midpoint rooted maximum likelihood phylogenetic tree of *Orthomyxoviridae* showing the position of new variant identified (represented by a solid black circle). Bootstrap support values are displayed when greater than 70.

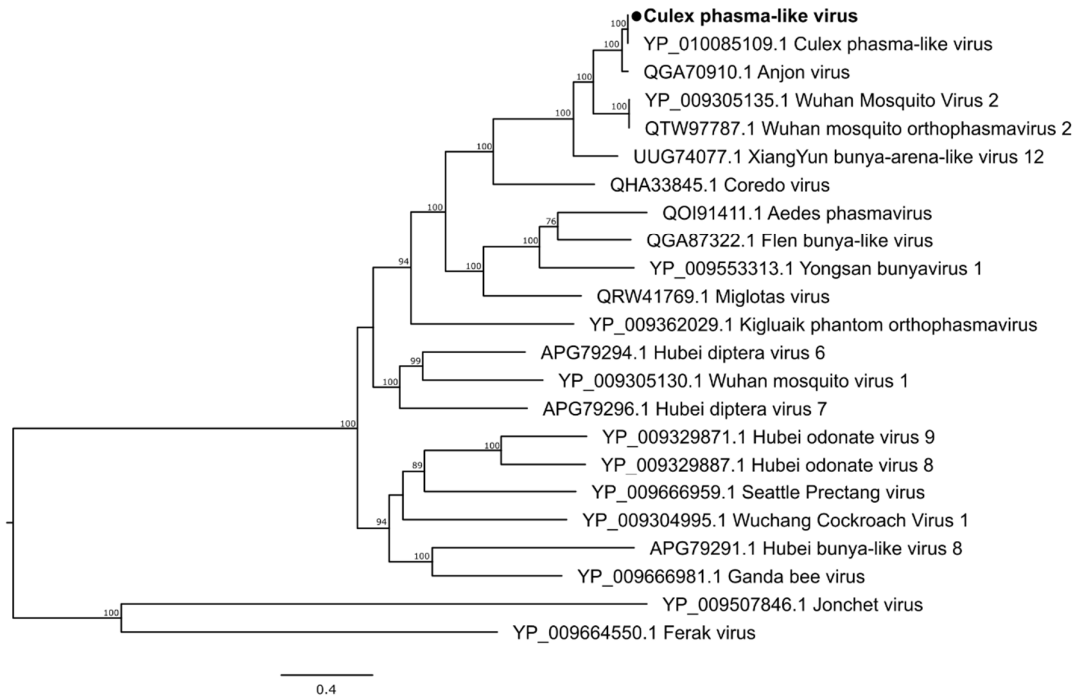

**Figure S9.** Midpoint rooted maximum likelihood phylogenetic tree of *Phasmaviridae* showing the position of new variant identified (represented by a solid black circle). Bootstrap support values are displayed when greater than 70.

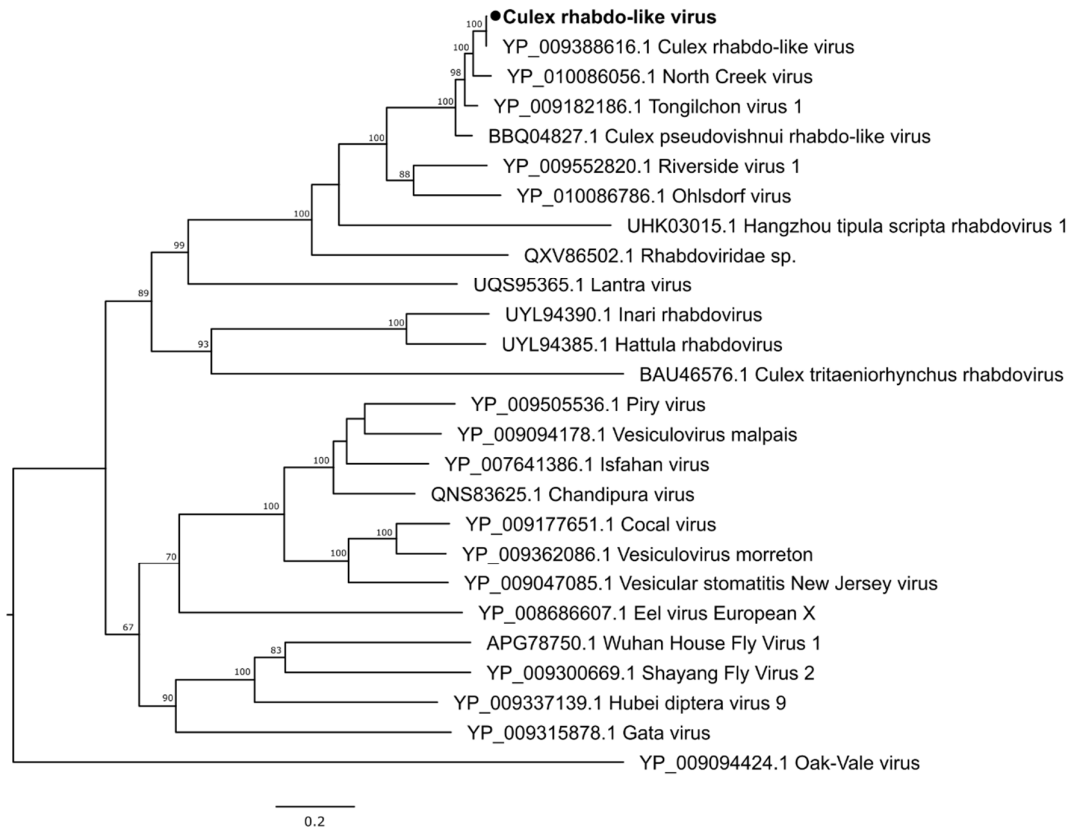



**Figure S10.** Midpoint rooted maximum likelihood phylogenetic tree of *Rhabdoviridae* showing the position of new variant identified (represented by a solid black circle). Bootstrap support values are displayed when greater than 70.

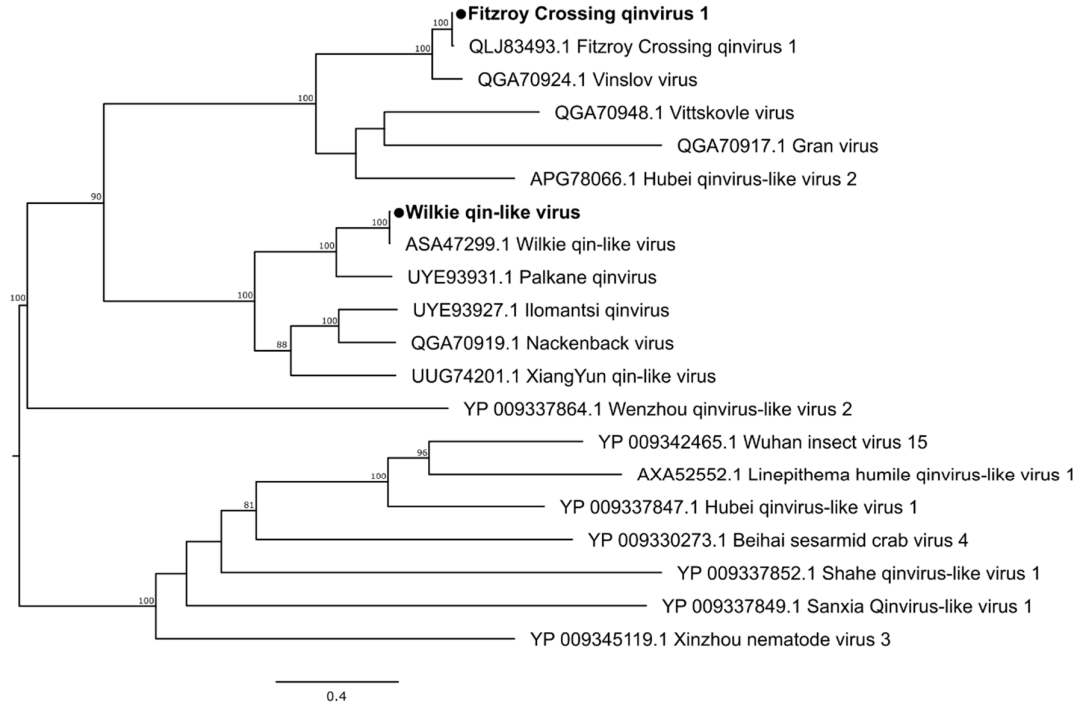

**Figure S11.** Midpoint rooted maximum likelihood phylogenetic tree of *Qinviridae* showing the position of new variant identified (represented by a solid black circle). Bootstrap support values are displayed when greater than 70.

**Table S1.** Number of sequencing reads, contigs and viral reads for each mosquito pool.

| <b>Mosquito Species</b>                         | <b>Total number of paired<br/>end reads</b> | <b>Total number of con-<br/>tigs</b> | <b>Total number of viral<br/>reads</b> |
|-------------------------------------------------|---------------------------------------------|--------------------------------------|----------------------------------------|
| <i>Aedes vigilax</i> Perth                      | 84,573,893                                  | 41,679                               | 1,171,387                              |
| <i>Aedes vigilax</i> Wynd-<br>ham               | 85,644,338                                  | 48,447                               | 63,542                                 |
| <i>Culex annulirostris</i><br>Karratha          | 85,648,932                                  |                                      | 36,016                                 |
| <i>Culex annulirostris</i><br>Wyndham           | 183,824,887                                 | 135,094                              | 280,507                                |
| <i>Culex australicus</i>                        | 91,087,030                                  | 93,517                               | 458,824                                |
| <i>Culex globocoxitus</i>                       | 89,581,506                                  | 77,716                               | 6,676,523                              |
| <i>Culex pipiens</i> biotype<br><i>molestus</i> | 85,626,777                                  | 46,624                               | 726,151                                |
| <i>Culex quinquefasciatus</i>                   | 110,271,729                                 | 70,449                               | 807,873                                |
